# Supplementary material
Source: publisher site journal article supplement (https://www.dovepress.com/article/258487)
Supplement: Supplementary file 1 [file get_supplementary_file.php]

Figure S1

MiR-181a-5p down-regulated the expression of p-mTOR and p-AKT in A549 and NCI-H1299 cells


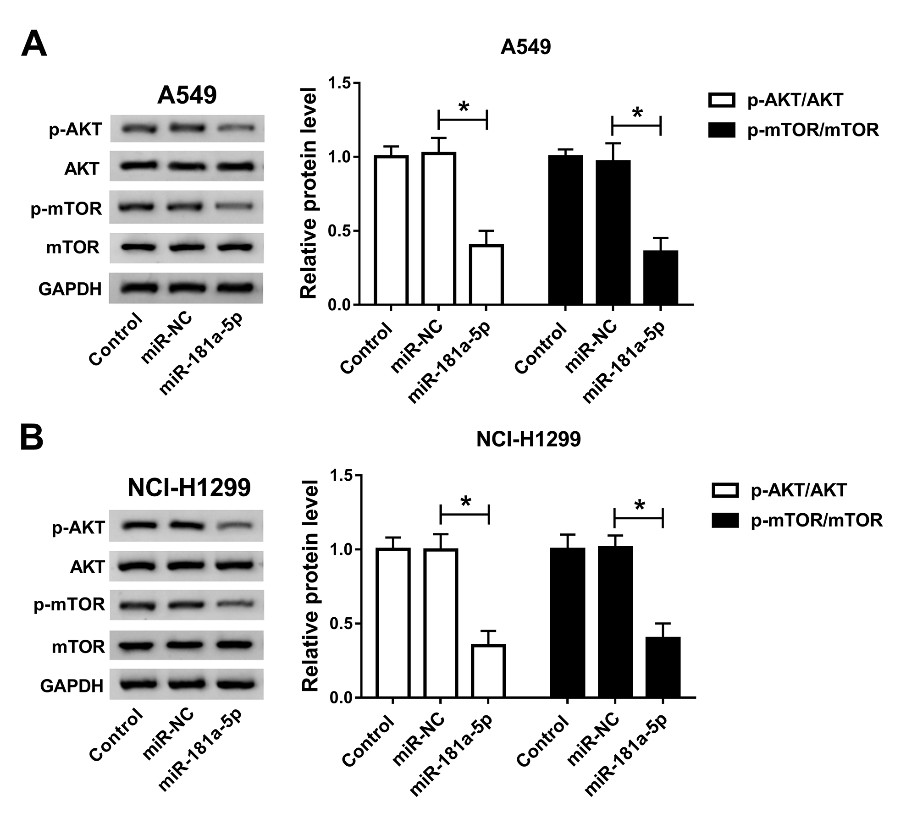


**Figure S1 MiR-181a-5p regulated the expression of p-mTOR and p-AKT.** (A) The protein expression level of p-AKT, AKT, p-mTOR and mTOR were detected by western blot assay in A549 cells. (B) The expression level of p-AKT, AKT, p-mTOR and mTOR were measured by western blot assay in NCI-H1299 cells. **P*<0.05.
